# Supplementary material for: Comprehensive genomic characterization of programmed cell death-related genes to predict drug resistance and prognosis for patients with multiple myeloma
Source: publisher site journal article supplement (doi:10.18632/aging.206234), 2025-04-01
Supplement: Supplementary file [file aging-v17-206234-supplementary-material-SD1.pdf]

## SUPPLEMENTARY FIGURE

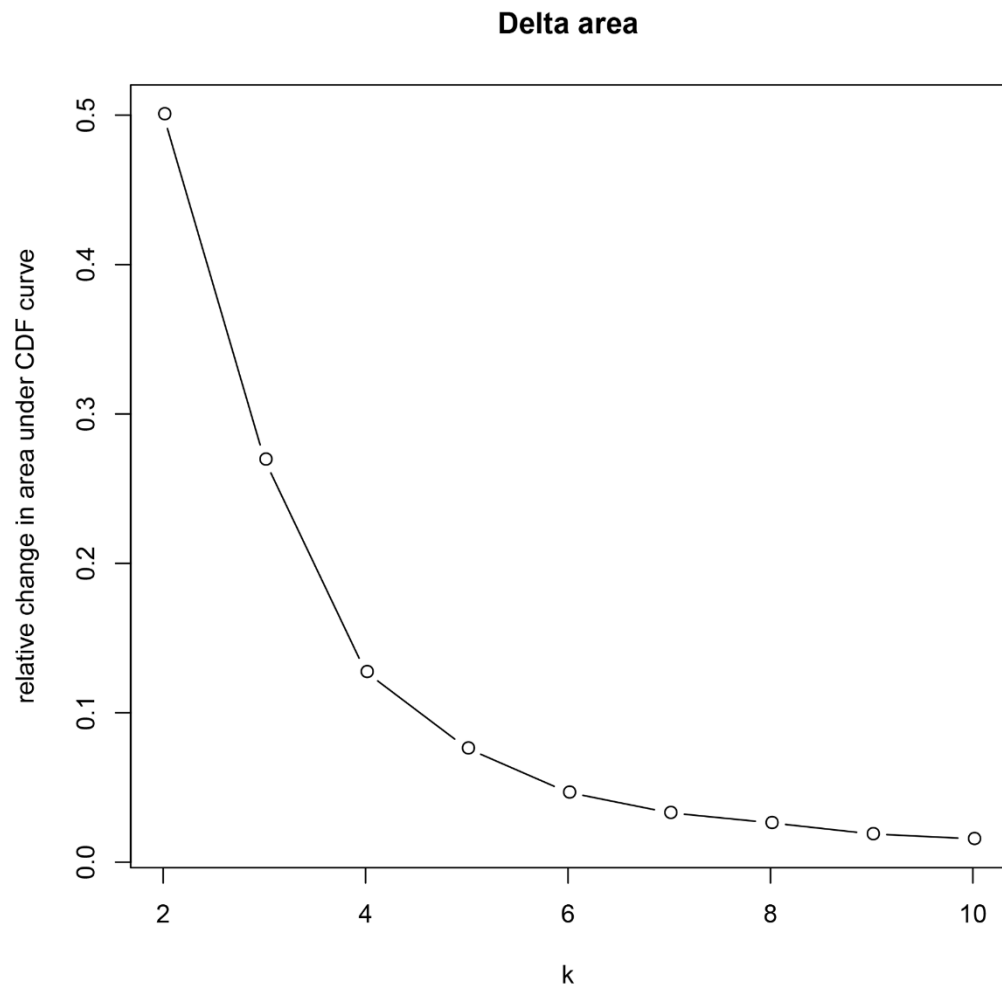

**Supplementary Figure 1. Formulaic cluster analysis of MM prognosis-associated PCD genes.** (S1) Horizontal coordinates indicate the number of categories  $k$  and vertical coordinates indicate the relative change in area under the CDF curve.
